# Supplementary material for: Improving Breast Cancer Survival Analysis through Competition-Based Multidimensional Modeling
Source: PLoS Comput Biol. 2013 May 9;9(5):e1003047. doi: 10.1371/journal.pcbi.1003047 (PMC3649990; doi:10.1371/journal.pcbi.1003047)
Supplement: Table S1 — Complete details of all the models submitted to the pilot competition in the uncontrolled experimental design. Source code for all models are available using the Synapse IDs listed in this table (see Methods for description of how to view model source code). (XLSX) [file pcbi.1003047.s002.xlsx]

## Sheet: metabric_results.tsv
Model name	Category	Validation c-index	Synapse ID	Model description
GBM model	MPC	0.67071	syn168297	Boosting using clinical features, selected gene expression features and genomic instability index (best-performing model, details in main text)
Parallel3 Rank TFM1 Enet IQM EXP CNA Model	MPC	0.661721	syn169246	After rank transformation of training data and pruning process with the list of transcription factors and modulators, the best combination of clinical covariates by brute force searcing + penalized molecular features from Exp and CNA by Elastic Net regression with 10 fold Cross Validation, where interquartile average of metric to select features was applied
Parallel Rank TF1 Enet Mean CNA Model	MPC	0.659542	syn169392	After rank transformation of training data and pruning process with the list of transcription factors, the best combination of clinical covariates by brute force searcing + penalized molecular features from only CNA by Elastic Net regression with 10 fold Cross Validation, where arithmetic mean of metric to select features was applied
RF model	MPC	0.65951	syn168299	Random forest using clinical features, selected gene expression features and genomic instability index (best-performing model, details in main text)
RANK IQM ENet penalty CNA and unpenalty best CC	MC	0.65935	syn168253	After rank transformation of training data, the best combination of clinical covariates by brute force searcing + penalized molecular features from only CNA by Elastic Net regression with 10 fold Cross Validation, where interquartile average of metric to select features was applied
Parallel Rank M1 Enet Mean EXP Model	MPC	0.658116	syn169269	After rank transformation of training data and pruning process with the list of modulators, the best combination of clinical covariates by brute force searcing + penalized molecular features from only Exp by Elastic Net regression with 10 fold Cross Validation, where arithmetic mean of metric to select features was applied
Parallel3 Rank TFM1 Enet Mean EXP Model	MPC	0.657972	syn169244	After rank transformation of training data and pruning process with the list of transcription factors and modulators, the best combination of clinical covariates by brute force searcing + penalized molecular features from only Exp by Elastic Net regression with 10 fold Cross Validation, where arithmetic mean of metric to select features was applied
RANK best CC model	C	0.657643	syn168251	After rank transformation of training data, brute-force searching was applied for finding the best combination of clinical covariates
RANK Mean ENet penalty CNA and unpenalty best CC	MC	0.65661	syn168273	After rank transformation of training data, the best combination of clinical covariates by brute force searcing + penalized molecular featuresfrom only CNA by Elastic Net regression with 10 fold Cross Validation, where arithmetic average of metric to select features was applied
RF model with gene expr.	MC	0.656354	syn167497	Random Survival Forests 10000 trees Clinical features and molecular features with high variance.
boosting with top 1000 varying onco-features and all clinical features 10000 rounds	MPC	0.654832	syn169809	Boosting with 1000 top-variance features corresponding to Higgins et al's list of onco-genes and all clinical features, 10000 iterations
RF Model (censored)	C	0.654431	syn163347	Random Survival Forests 1000 trees Clinical features
GB model with Metabric clustering features BCC Final	MPC	0.654017	syn301202	Boosting model with all clinical features and molecular features used to define survival classes in Curtis et al, 2012
boosting with top 500 varying onco-features and all clinical features 1000 rounds	MPC	0.650313	syn169676	Boosting with 500 top-variance features corresponding to Higgins et al's list of onco-genes and all clinical features, 1000 iterations
boosting with top 1k varying onco-features and all clinical features 1000 rounds	MPC	0.64767	syn169678	Boosting with 1000 top-variance features corresponding to Higgins et al's list of onco-genes and all clinical features, 1000 iterations
Parallel Rank M1 Enet IQM CNA Model	MPC	0.64525	syn169267	After rank transformation of training data and pruning process with the list of modulators, the best combination of clinical covariates by brute force searcing + penalized molecular features from only CNA by Elastic Net regression with 10 fold Cross Validation, where interquartile mean of metric to select features was applied
boosting with top 500 onco-features and all clinical features 10000 rounds	MPC	0.643728	syn169746	Boosting with 500 top-variance features corresponding to Higgins et al's list of onco-genes and all clinical features, 10000 iterations
Parallel Rank TF1 Enet IQM CNA Model	MPC	0.643055	syn169398	After rank transformation of training data and pruning process with the list of transcription factors, the best combination of clinical covariates by brute force searcing + penalized molecular features from only CNA by Elastic Net regression with 10 fold Cross Validation, where interquartile mean of metric to select features was applied
CoxNet v2d (Ferte Features)	MPC	0.641918	syn164412	Elastic net clinical model plus features from Ferte et al 2010
Parallel4 Rank M1 Enet IQM CNA Model	MPC	0.641148	syn169833	After rank transformation of training data and pruning process with the list of modulators, both of clinical covariates and molecular features from only CNA are penalized by Elastic Net regression with 10 fold Cross Validation, where interquartile mean of metric to select features was applied
boosting with all onco-features and all clinical features 1000 rounds	MPC	0.640363	syn169680	Boosting with all molecular features corresponding to Higgins et al's list of onco-genes and all clinical features, 1000 iterations
RSF with Ross Ferte and Andre Features v1c	MPC	0.640251	syn168463	Random survival forest clinical model plus features from Ferte et al 2010
GB model with 1000 Metabric features BCC	MPC	0.64006	syn301182	Boosting model with all clinical features and 1000 causal features in Curtis et al, 2012
clinical-only model AM	C	0.640051	syn163294	Uses only the clinical data, and runs elastic net to choose the most informative features. It then fits a Cox model with 5-fold cross validation
RANK Mean ENet penalty EXP and unpenalty best CC	MC	0.639642	syn168257	After rank transformation of training data, the best combination of clinical covariates by brute force searcing + penalized molecular featuresfrom only EXP by Elastic Net regression with 10 fold Cross Validation, where arithmetic average of metric to select features was applied
Parallel4 Rank M1 Enet Mean CNA Model	MPC	0.639642	syn169829	After rank transformation of training data and pruning process with the list of modulators, both of clinical covariates and molecular features from only CNA are penalized by Elastic Net regression with 10 fold Cross Validation, where arithmetic mean of metric to select features was applied
Parallel Rank TF1 Enet IQM EXP CNA Model	MPC	0.638985	syn169396	After rank transformation of training data and pruning process with the list of transcription factors, the best combination of clinical covariates by brute force searcing + penalized molecular features from Exp and CNA by Elastic Net regression with 10 fold Cross Validation, where interquartile mean of metric to select features was applied
10 folds IQM penalized CNA plus unpenalized best CC model	MC	0.638585	syn165151	Without any transformation of training data, the best combination of clinical covariates by brute force searcing + penalized molecular featuresfrom only CNA by Elastic Net regression with 10 fold Cross Validation, where interquartile mean of metric to select features was applied
best CC model	C	0.638529	syn162337	Without any transformation, brute-force searching was just applied for finding the best combination of clinical covariates
CoxNet v2d (Ferte Features) Rank Transformed	MPC	0.638256	syn164815	Elastic net model with rank transformed molecular features from Ferte et al 2010
CoxNet v2c (Ross Features)	MPC	0.638232	syn164410	Elastic net model with rank transformed molecular features from Ferte et al 2010
penalized CNA plus unpenalized best CC model	MC	0.637896	syn164224	Without any transformation of training data, the best combination of clinical covariates by brute force searcing + penalized molecular featuresfrom only CNA by Elastic Net regression with 10 fold Cross Validation, where arithmetic mean of metric to select features was applied
penalized CNA plus unpenalized best CC model	MC	0.637896	syn165132	Without any transformation of training data, the best combination of clinical covariates by brute force searcing + penalized molecular featuresfrom only CNA by Elastic Net regression with 10 fold Cross Validation, where arithmetic mean of metric to select features was applied
CoxNet v2 (Baseline)	C	0.637728	syn167649	Clinical only model, using elastic net.
10 folds Mean penalized EXP_CNA plus unpenalized best CC model	MC	0.637463	syn165147	Without any transformation of training data, the best combination of clinical covariates by brute force searcing + penalized molecular features from both Exp and CNA by Elastic Net regression with 10 fold Cross Validation, where arithmetic mean of metric to select features was applied
CoxNet v2e (Andre Features)	MPC	0.637383	syn164417	Elastic net model with rank transformed molecular features from Ferte et al 2010
10 folds IQM penalized EXP plus unpenalized best CC model	MC	0.637047	syn165149	Without any transformation of training data, the best combination of clinical covariates by brute force searcing + penalized molecular featuresfrom only Exp by Elastic Net regression with 10 fold Cross Validation, where interquartile mean of metric to select features was applied
Parallel4 Rank TF1 Enet Mean CNA Model	MPC	0.637031	syn169825	After rank transformation of training data and pruning process with the list of transcription factors, both of clinical covariates and molecular features from only CNA are penalized by Elastic Net regression with 10 fold Cross Validation, where arithmetic mean of metric to select features was applied
10 folds Mean penalized Expr plus unpenalized best CC model	MC	0.636951	syn164240	Without any transformation of training data, the best combination of clinical covariates by brute force searcing + penalized molecular featuresfrom only Exp by Elastic Net regression with 10 fold Cross Validation, where arithmetic mean of metric to select features was applied
clinical Cox model (baseline predictor for other models)	C	0.634713	syn161437	Cox model built on clinical features
Parallel4 Rank TFM1 Enet Mean CNA Model	MPC	0.633089	syn169851	After rank transformation of training data and pruning process with the list of transcription factors and modulators, both of clinical covariates and molecular features from only CNA are penalized by Elastic Net regression with 10 fold Cross Validation, where arithmetic mean of metric to select features was applied
Parallel4 Rank TFM1 Enet IQM CNA Model	MPC	0.628058	syn169845	After rank transformation of training data and pruning process with the list of transcription factors and modulators, both of clinical covariates and molecular features from only CNA are penalized by Elastic Net regression with 10 fold Cross Validation, where interquartile mean of metric to select features was applied
CoxNet v2a (Baseline Aggressive)	C	0.626704	syn167651	Clinical plus all Ferte / Andre features.
boosting model with clinical features 50 rounds	C	0.626144	syn163182	Boosted Cox model with clinical features, 50 iterations
Parallel Rank M1 Enet IQM EXP CNA Model	MPC	0.626136	syn169265	After rank transformation of training data and pruning process with the list of modulators, both of clinical covariates and molecular features from only CNA are penalized by Elastic Net regression with 10 fold Cross Validation, where interquartile mean of metric to select features was applied
CoxNet v2a (Baseline Aggressive)	C	0.625775	syn164395	Clinical plus all Ferte / Andre features.
RSF v3b with univariate-selected Features	MC	0.624774	syn169685	Clinical model plus top correlated molecular features from univariate analysis
boosting with 5k top varying molecular and all clinical features 200 iterations	MC	0.621729	syn164302	Boosted Cox model with 5k highest variance molecular and all clinical features, 200 iterations
Parallel4 Rank M1 Enet IQM EXP CNA Model	MPC	0.621105	syn169831	After rank transformation of training data and pruning process with the list of modulators, both of clinical covariates and molecular features from Exp and CNA are penalized by Elastic Net regression with 10 fold Cross Validation, where interquartile mean of metric to select features was applied
RSF v3 with univariate-selected Features	MC	0.620752	syn169405	Clinical model plus top correlated molecular features from univariate analysis
Parallel4 Rank TFM1 Enet IQM EXP CNA Model	MPC	0.620608	syn169843	After rank transformation of training data and pruning process with the list of transcription factors and modulators, both of clinical covariates and molecular features from Exp and CNA are penalized by Elastic Net regression with 10 fold Cross Validation, where interquartile mean of metric to select features was applied
MD-Prioritized KNN v1	MPC	0.618701	syn162661	Clinical plus all Ferte / Andre features.
RSF v4 with univariate-selected Features	MC	0.618541	syn169674	Clinical model plus top correlated molecular features from univariate analysis
vpModel with boosting	MPC	0.617801	syn164383	This algorithm first infers relative activity of transcription factors based only on relative expression levels of their target genes (regulon inferred by reverse engineering algorithms). Then it fits a cox model on the TF activity space and use elastic-net with cross-validation to select the TFs whose activity show the highest association with Cox's risk
Serial Rank M1 Ridge EXP Model	MPC	0.617772	syn169168	After rank transformation of training data and pruning process with the list of modulators, the combination of clinical covariates selected by brute-force searching and penalized molecular features from only Exp penalized by Ridge regression with 10 fold Cross Validation, where arithmetic mean of metric to select features was applied
MD-Prioritized KNN v1b	MPC	0.61653	syn162706	KNN, features chosen by Mds
best CC variables	C	0.616306	syn163299	lasso cox regression with only the clinical variables
Coxnet Clinical variables with Top 100 marginal features	MC	0.615256	syn164309	lasso cox regression with all the clinical data and the top 100 features from a marginal analysis
Serial Rank M1 Ridge EXP CNA Model	MPC	0.614535	syn169166	After applying rank transformation of training data and pruning process with the list of modulators, the combination of brute-force searched clinical covairates and penalized molecular features from Exp and CNA by Ridge regression with 10 fold Cross Validation, where arithmetic mean of metric to select features was applied
SVD+Clinical Model	MC	0.61194	syn162531	Combines the top 3 principal components obtained from gene expression data (filtered for genes associated with survival) with clinical covariates into a cox regression model. Bootstrapping is applied to select the model that is both parsimonious and highly predictive of survival.
Serial Rank Lasso EXP Model	MC	0.611892	syn168964	After applying rank transformation of training data, penalized molecular features from only Exp by Lasso regression with 10 fold Cross Validation, where arithmetic mean of metric to select features was applied
vpModel with boosting without clinical data	M	0.610766	syn164385	This algorithm first infers relative activity of transcription factors based only on relative expression levels of their target genes (regulon inferred by reverse engineering algorithms). Then it fits a cox model on the TF activity space and use elastic-net with cross-validation to select the TFs whose activity show the highest association with Cox's risk
Serial Rank TFM1 Ridge EXP Model	MPC	0.610562	syn169180	After applying rank transformation of training data and pruning process with the list of transcription factors and modulators, the combination of brute-force searched clinical covairates and penalized molecular features from Exp by Ridge regression with 10 fold Cross Validation, where arithmetic mean of metric to select features was applied
Serial Rank Ridge EXP Model	MC	0.610482	syn168802	After applying rank transformation of training data, penalized molecular features from only Exp by Ridge regression with 10 fold Cross Validation, where arithmetic mean of metric to select features was applied
boosting with 5k top varying molecular and all clinical features	MC	0.610209	syn165226	Boosted Cox model with 5k highest variance molecular and all clinical features, 100 iterations
Serial Rank TFM1 Ridge EXP CNA Model	MPC	0.609296	syn169178	After applying rank transformation of training data and pruning process with the list of transcription factors and modulators, the combination of brute-force searched clinical covairates and penalized molecular features from Exp and CNA by Ridge regression with 10 fold Cross Validation, where arithmetic mean of metric to select features was applied
Serial Rank Lasso EXP CNA Model	MC	0.607966	syn168849	After applying rank transformation of training data, penalized molecular features from Exp and CNA by Lasso regression with 10 fold Cross Validation, where arithmetic mean of metric to select features was applied
Serial Rank TF Ridge EXP CNA Model	MPC	0.60771	syn169076	After applying rank transformation of training data and pruning process with the list of transcription factors, the combination of brute-force searched clinical covairates and penalized molecular features from Exp and CNA by Ridge regression with 10 fold Cross Validation, where arithmetic mean of metric to select features was applied
Serial Rank Ridge EXP CNA Model	MC	0.607069	syn168991	After applying rank transformation of training data, penalized molecular features from Exp and CNA by Ridge regression with 10 fold Cross Validation, where arithmetic mean of metric to select features was applied
MD-Prioritized KNN v1c	MPC	0.605515	syn162714	KNN, features chosen by Mds
Parallel4 Rank TF1 Enet IQM EXP CNA Model	MPC	0.601798	syn169823	After rank transformation of training data and pruning process with the list of modulators, both of clinical covariates and molecular features from Exp and CNA are penalized by Elastic Net regression with 10 fold Cross Validation, where interquartile mean of metric to select features was applied
Serial Rank TFM1 Ridge CNA Model	MPC	0.601541	syn169182	After applying rank transformation of training data and pruning process with the list of transcription factors and modulators, the combination of brute-force searched clinical covairates and penalized molecular features from CNA by Ridge regression with 10 fold Cross Validation, where arithmetic mean of metric to select features was applied
Serial Rank M1 Ridge CNA Model	MPC	0.601445	syn169170	After applying rank transformation of training data and pruning process with the list of modulators, the combination of brute-force searched clinical covairates and penalized molecular features from only CNA by Ridge regression with 10 fold Cross Validation, where arithmetic mean of metric to select features was applied
Parallel4 Rank TF1 Enet Mean EXP Model	MPC	0.600676	syn170312	After rank transformation of training data and pruning process with the list of transcription factors, both of clinical covariates and molecular features from only Exp are penalized by Elastic Net regression with 10 fold Cross Validation, where arithmetic mean of metric to select features was applied
Serial Rank TF Ridge EXP Model	MPC	0.599891	syn169078	After applying rank transformation of training data and pruning process with the list of transcription factors, the combination of brute-force searched clinical covairates and penalized molecular features from only Exp by Ridge regression with 10 fold Cross Validation, where arithmetic mean of metric to select features was applied
Serial Rank Ridge CNA Model	MC	0.595853	syn168843	After applying rank transformation of training data, penalized molecular features from only CNA by Ridge regression with 10 fold Cross Validation, where arithmetic mean of metric to select features was applied
2xGBM model	MPC	0.595084	syn213911	Boosting using clinical features, selected gene expression features and genomic instability index. Separate models built for ER- and ER+ samples, and predictions merged
Parallel5 Rank TF1 Enet Mean CNA Model	MP	0.594748	syn169838	After applying rank transformation of training data and pruning process with the list of transcription factors only, penalized molecular features from only CNA by Elastic Net regression with 10 fold Cross Validation, where arithmetic mean of metric to select features was applied
Serial Rank TF Lasso EXP CNA Model	MPC	0.593915	syn169071	After applying rank transformation of training data and pruning process with the list of transcription factors, the combination of brute-force searched clinical covairates and penalized molecular features from Exp and CNA by Lasso regression with 10 fold Cross Validation, where arithmetic mean of metric to select features was applied
Parallel5 Rank TFM1 Enet IQM EXP CNA Model	MP	0.593322	syn169866	After applying rank transformation of training data and pruning process with the list of transcription factors and modulators, penalized molecular features from Exp and CNA by Elastic Net regression with 10 fold Cross Validation, where Interquartile mean of metric to select features was applied
rf 1000 trees top 10 subtype features (new)	MC	0.591656	syn273351	Random Survival Forests 1000 trees Clinical features and top 10 molecular features correlated with outcome selected for each subtype predetermined by clustering
Serial Rank TF1 Lasso EXP Model	MPC	0.588579	syn169084	After applying rank transformation of training data and pruning process with the list of transcription factors, the combination of brute-force searched clinical covairates and penalized molecular features from Exp by Lasso regression with 10 fold Cross Validation, where arithmetic mean of metric to select features was applied
boosting model with top 5k correlated molecular and all clinical features	MC	0.588211	syn165367	Boosted Cox model with all clinical features and 5k molecular features with the highest absolute value of Pearson's correlation with survival times (on half of the training set and training using the other half), 100 iterations
Serial Rank TFM1 Lasso EXP CNA Model	MC	0.588195	syn169172	After applying rank transformation of training data and pruning process with the list of transcription factors and modulator, penalized molecular features from Exp and CNA by Lasso regression with 10 fold Cross Validation, where arithmetic mean of metric to select features was applied
boosting model with top 5k correlated molecular on a third of training set and all clinical features	MC	0.58789	syn168788	Boosted Cox model with all clinical features and 5k molecular features with the highest absolute value of Pearson's correlation with survival times (on a third of the training set and training using the other two-thirds), 100 iterations
Serial Rank TF Ridge CNA Model	MPC	0.586432	syn169080	After applying rank transformation of training data and pruning process with the list of transcription factors, the combination of brute-force searched clinical covairates and penalized molecular features from CNA by Ridge regression with 10 fold Cross Validation, where arithmetic mean of metric to select features was applied
Serial Rank TF1 Ridge CNA Model	MPC	0.586432	syn169092	After applying rank transformation of training data and pruning process with the list of transcription factors, the combination of brute-force searched clinical covairates and penalized molecular features from CNA by Ridge regression with 10 fold Cross Validation, where arithmetic mean of metric to select features was applied
Serial Rank M Lasso EXP CNA Model	MPC	0.585423	syn169006	After applying rank transformation of training data and pruning process with the list of modulators, the combination of brute-force searched clinical covairates and penalized molecular features from Exp and CNA by Lasso regression with 10 fold Cross Validation, where arithmetic mean of metric to select features was applied
Serial Rank M1 Lasso EXP CNA Model	MPC	0.584333	syn169160	With the same model in 102, arranged new grid for alpha of Lasso in order to figure out how much refinment of grid affects the prediction performance
MD-Prioritized KNN v3	MPC	0.583444	syn162698	KNN, features chosen by Mds
Serial Rank TF Lasso EXP Model	MPC	0.581337	syn169067	After applying rank transformation of training data and pruning process with the list of transcription factors, the combination of brute-force searched clinical covairates and penalized molecular features from Exp by Lasso regression with 10 fold Cross Validation, where arithmetic mean of metric to select features was applied
Parallel5 Rank TFM1 Enet IQM CNA Model	MP	0.581273	syn170173	After applying rank transformation of training data and pruning process with the list of transcription factors and modulators, penalized molecular features from only CNA by Elastic Net regression with 10 fold Cross Validation, where Interquartile mean of metric to select features was applied
Parallel5 Rank M1 Enet IQM EXP CNA Model	MP	0.581225	syn170046	After applying rank transformation of training data and pruning process with the list of modulators, penalized molecular features from Exp and CNA by Elastic Net regression with 10 fold Cross Validation, where interquartile mean of metric to select features was applied
Serial Rank M1 Lasso EXP Model	MPC	0.58044	syn169162	After applying rank transformation of training data and pruning process with the list of modulators, the combination of brute-force searched clinical covairates and penalized molecular features from Exp by Lasso regression with 10 fold Cross Validation, where arithmetic mean of metric to select features was applied
Parallel5 Rank M1 Enet Mean EXP Model	MP	0.579991	syn170044	After applying rank transformation of training data and pruning process with the list of modulators, penalized molecular features from only Exp by Elastic Net regression with 10 fold Cross Validation, where arithmetic mean of metric to select features was applied
Parallel5 Rank M2 Enet IQM CNA Model	MP	0.573791	syn225658	After applying rank transformation of training data and pruning process with the list of modulators, penalized molecular features from only CNA by Elastic Net regression with 10 fold Cross Validation, where interquartile mean of metric to select features was applied
Parallel5 Rank M1 Enet Mean CNA Model	MP	0.572237	syn170042	After applying rank transformation of training data and pruning process with the list of modulators, penalized molecular features from only CNA by Elastic Net regression with 10 fold Cross Validation, where arithmetic mean of metric to select features was applied
random forest model with 5000 top varying mol. features and 100 iterations	M	0.570458	syn164094	Random forest model with 5000 highest variance molecular features and 100 iterations
Serial Rank TFM1 Lasso EXP Model	MPC	0.570202	syn169174	After applying rank transformation of training data and pruning process with the list of transcription factors and modulators, the combination of brute-force searched clinical covairates and penalized molecular features from Exp by Lasso regression with 10 fold Cross Validation, where arithmetic mean of metric to select features was applied
Parallel5 Rank TF1 Enet Mean EXP Model	MP	0.565091	syn169841	After applying rank transformation of training data and pruning process with the list of transcription factors only, penalized molecular features from only Exp by Elastic Net regression with 10 fold Cross Validation, where arithmetic mean of metric to select features was applied
Serial Rank Lasso CNA Model	MPC	0.561197	syn168793	After applying rank transformation of training data, the combination of brute-force searched clinical covairates and penalized molecular features from CNA by Lasso regression with 10 fold Cross Validation, where arithmetic mean of metric to select features was applied
CoxNet v2b (All Features)	MC	0.559579	syn164408	Elastic net with all clinical and molecular features
CoxphModel_age	C	0.557095	syn162668	Cox model built on clinical features
fixed rpart tree model with clinical features and censoring	C	0.555357	syn163284	Random forest model with clinical features and censoring
Serial Rank TF Lasso CNA Model	MPC	0.550895	syn169074	After applying rank transformation of training data and pruning process with the list of transcription factors, the combination of brute-force searched clinical covairates and penalized molecular features from CNA by Lasso regression with 10 fold Cross Validation, where arithmetic mean of metric to select features was applied
Serial Rank M1 Lasso CNA Model	MPC	0.546889	syn169164	After applying rank transformation of training data and pruning process with the list of modulators, the combination of brute-force searched clinical covairates and penalized molecular features from CNA by Lasso regression with 10 fold Cross Validation, where arithmetic mean of metric to select features was applied
Serial Rank TFM1 Lasso CNA Model	MPC	0.537636	syn169176	After applying rank transformation of training data and pruning process with the list of transcription factors and modulators, the combination of brute-force searched clinical covairates and penalized molecular features from CNA by Lasso regression with 10 fold Cross Validation, where arithmetic mean of metric to select features was applied
high complexity model	MC	0.533415	syn162211	lasso cox regression model with all clinical features and molecular features selected by a sparse regression analysis (about 20 features)
CoxphModel_stepAIC	C	0.513379	syn162670	Cox model built on clinical features
CphClinicalModel	C	0.509693	syn162597	Cox model built on clinical features
