# Supplementary material for: Improving Breast Cancer Survival Analysis through Competition-Based Multidimensional Modeling
Source: PLoS Comput Biol. 2013 May 9;9(5):e1003047. doi: 10.1371/journal.pcbi.1003047 (PMC3649990; doi:10.1371/journal.pcbi.1003047)
Supplement: Table S3 — Top 50 oncogenes and transcription factors inferred by the MASP feature selection algorithm. (XLSX) [file pcbi.1003047.s004.xlsx]

## Sheet: Sheet1
Supplementary Table 3: Top 50 oncogenes and transcription factors
Gene Symbol	Cytoband	Survival association score	Cancer gene	Transcription factor
GSK3B	3q13.33	461.881	YES	No
RAB28	4p15.33	450.705	YES	No
FOXA3	19q13.32	446.242	No	YES
ERBB2	17q12	445.223	YES	No
PHF12	17q11.2	439.908	No	YES
DNMT3B	20q11.21	438.546	YES	No
ERBB2	17q12	438.092	YES	No
POLR3A	10q22.3	432.663	No	YES
SUPT6H	17q11.2	430.164	No	YES
CTDSPL	3p22.2b-p22.2	429.449	YES	YES
NR2C2	3p24.3	423.785	No	YES
NPAS1	19q13.32	418.29	No	YES
PBX1	1q23.3d-q23.3	416.626	No	YES
RASL10B	17q12	407.353	YES	No
PPARD	6p21.31	401.098	YES	YES
TUSC4	3p21.31	399.61	YES	No
ZSCAN21	7q22.1	398.482	No	YES
LCN2	9q34.11	397.926	YES	No
PHF20	20q11.22b-q11.23	397.876	No	YES
RBM15B	3p21.2	397.836	No	YES
RAXL1	19p13.3	397.467	No	YES
BCL2	18q21.33	396.38	YES	No
RBBP8	18q11.2	396.295	YES	No
RINT1	7q22.2	390.173	YES	No
TEAD3	6p21.31	390.145	No	YES
ZNF41	Xp11.3	386.561	No	YES
TBX1	22q11.21	385.874	No	YES
ZNF589	3p21.31	384.499	No	YES
RBM39	20q11.22	381.914	No	YES
NOTCH3	19p13.12	381.534	No	YES
NUP98	11p15.4	381.318	YES	No
APITD1	1p36.22	381.189	YES	No
ACTB	7p22.1	380.897	YES	No
HIST1H2BG	6p22.1	379.684	No	YES
ELF3	1q32.1	378.673	No	YES
ARHGEF5	7q35	377.827	YES	No
ITGB1	10p11.22	377.74	YES	No
HMGA2	12q14.3	377.152	YES	YES
ST7	7q31.2	375.986	YES	No
CST6	11q13.1	375.134	YES	No
CEP110	9q33.2	375.079	No	YES
MLL3	7q36.1	374.076	No	YES
HMGN2	1p36.11	373.725	No	YES
PTPRG	3p14.2	372.123	YES	No
POLR3A	10q22.3	371.984	No	YES
TOM1L2	17p11.2	371.395	YES	No
TNRC4	1q21.3	370.571	No	YES
AKR1B10	7q33	369.997	YES	No
RBM15	1p13.3	369.946	No	YES
TCL1B	14q32.13	369.471	YES	No
