# Supplementary material for: Improving Breast Cancer Survival Analysis through Competition-Based Multidimensional Modeling
Source: PLoS Comput Biol. 2013 May 9;9(5):e1003047. doi: 10.1371/journal.pcbi.1003047 (PMC3649990; doi:10.1371/journal.pcbi.1003047)
Supplement: Table S4 — Complete details of all the models evaluated in the controlled experiment. Source code for all models is available using the Synapse IDs listed in this table. (XLSX) [file pcbi.1003047.s005.xlsx]

## Sheet: Supplementary Table 3
Model ID	Algorithm	Feature Set	Train Score	Test Score	Algorithm Details
syn380722	Random Forest	clinical_gii	0.815967	0.676116	R randomSurvivalForest library was used with default parameters and 1000 trees
syn673336	Boosting	clinical_gii	0.789371	0.675757	R gbm package was used and the parameters were set as: shrinkage=0.003, n.trees=3000, interaction.depth=10 and cv.folds=5
syn673022	Boosting	MASP_clinical_gii	0.902395	0.671911	R gbm package was used and the parameters were set as: shrinkage=0.003, n.trees=3000, interaction.depth=10 and cv.folds=5
syn673346	Boosting	clinical	0.770972	0.668707	R gbm package was used and the parameters were set as: shrinkage=0.003, n.trees=3000, interaction.depth=10 and cv.folds=5
syn673351	Boosting	MASP_clinical	0.892025	0.668611	R gbm package was used and the parameters were set as: shrinkage=0.003, n.trees=3000, interaction.depth=10 and cv.folds=5
syn380690	Random Forest	clinical	0.787461	0.667869	R randomSurvivalForest library was used with default parameters and 1000 trees
syn376862	Random Forest	MASP_clinical_gii	0.9172	0.659402	R randomSurvivalForest library was used with default parameters and 1000 trees
syn380870	Random Forest	MASP_clinical	0.917489	0.659306	R randomSurvivalForest library was used with default parameters and 1000 trees
syn673451	Boosting	topvarying_higgins_clinical	0.931863	0.650586	R gbm package was used and the parameters were set as: shrinkage=0.003, n.trees=3000, interaction.depth=10 and cv.folds=5
syn311971	Lasso	cancer_census_clinical	0.731372	0.64954	R glmnet packaage was used and alpha=1, lambda=exp(seq(-5, 0, length = 25)),folds=5
syn312108	Elestic Net	cancer_census_clinical	0.73446	0.64869	R glmnet packaage was used and alpha=c(10^(-5:-1), seq(0.2, 1, by = 0.1)), lambda=exp(seq(-5, 0, length = 25)),folds=5
syn375451	Elestic Net	clinical_gii	0.736528	0.647047	R glmnet packaage was used and alpha=c(10^(-5:-1), seq(0.2, 1, by = 0.1)), lambda=exp(seq(-5, 0, length = 25)),folds=5
syn673401	Boosting	metabric_clustering_clinical	0.921402	0.646788	R gbm package was used and the parameters were set as: shrinkage=0.003, n.trees=3000, interaction.depth=10 and cv.folds=5
syn375365	Lasso	clinical_gii	0.728194	0.646534	R glmnet packaage was used and alpha=1, lambda=exp(seq(-5, 0, length = 25)),folds=5
syn673526	Boosting	cancer_census_clinical	0.945442	0.644641	R gbm package was used and the parameters were set as: shrinkage=0.003, n.trees=3000, interaction.depth=10 and cv.folds=5
syn416238	Elestic Net	MASP_clinical	0.768194	0.642672	R glmnet packaage was used and alpha=c(10^(-5:-1), seq(0.2, 1, by = 0.1)), lambda=exp(seq(-5, 0, length = 25)),folds=5
syn317550	Elestic Net	clinical	0.701147	0.642356	R glmnet packaage was used and alpha=c(10^(-5:-1), seq(0.2, 1, by = 0.1)), lambda=exp(seq(-5, 0, length = 25)),folds=5
syn311975	Lasso	metabric_clustering_clinical	0.704361	0.641726	R glmnet packaage was used and alpha=1, lambda=exp(seq(-5, 0, length = 25)),folds=5
syn312114	Elestic Net	metabric_clustering_clinical	0.713942	0.641245	R glmnet packaage was used and alpha=c(10^(-5:-1), seq(0.2, 1, by = 0.1)), lambda=exp(seq(-5, 0, length = 25)),folds=5
syn416234	Elestic Net	MASP_clinical_gii	0.750369	0.641085	R glmnet packaage was used and alpha=c(10^(-5:-1), seq(0.2, 1, by = 0.1)), lambda=exp(seq(-5, 0, length = 25)),folds=5
syn416222	Lasso	MASP_clinical_gii	0.750962	0.640941	R glmnet packaage was used and alpha=1, lambda=exp(seq(-5, 0, length = 25)),folds=5
syn311958	Elestic Net	topvarying_higgins_clinical	0.699063	0.640935	R glmnet packaage was used and alpha=c(10^(-5:-1), seq(0.2, 1, by = 0.1)), lambda=exp(seq(-5, 0, length = 25)),folds=5
syn311496	Lasso	topvarying_higgins_clinical	0.699063	0.640935	R glmnet packaage was used and alpha=1, lambda=exp(seq(-5, 0, length = 25)),folds=5
syn416226	Lasso	MASP_clinical	0.76278	0.639771	R glmnet packaage was used and alpha=1, lambda=exp(seq(-5, 0, length = 25)),folds=5
syn312118	Elestic Net	topvarying_clinical	0.771008	0.638489	R glmnet packaage was used and alpha=c(10^(-5:-1), seq(0.2, 1, by = 0.1)), lambda=exp(seq(-5, 0, length = 25)),folds=5
syn317554	Lasso	clinical	0.698744	0.638397	R glmnet packaage was used and alpha=1, lambda=exp(seq(-5, 0, length = 25)),folds=5
syn311979	Lasso	topvarying_clinical	0.769609	0.636839	R glmnet packaage was used and alpha=1, lambda=exp(seq(-5, 0, length = 25)),folds=5
syn673520	Boosting	topvarying_clinical	0.924215	0.633185	R gbm package was used and the parameters were set as: shrinkage=0.003, n.trees=3000, interaction.depth=10 and cv.folds=5
syn673512	Boosting	marginal_association_clinical	0.946795	0.625671	R gbm package was used and the parameters were set as: shrinkage=0.003, n.trees=3000, interaction.depth=10 and cv.folds=5
syn416236	Elestic Net	MASP	0.704315	0.624419	R glmnet packaage was used and alpha=c(10^(-5:-1), seq(0.2, 1, by = 0.1)), lambda=exp(seq(-5, 0, length = 25)),folds=5
syn673514	Boosting	MASP	0.89429	0.620688	R gbm package was used and the parameters were set as: shrinkage=0.003, n.trees=3000, interaction.depth=10 and cv.folds=5
syn673475	Boosting	topvarying_higgins	0.919836	0.620656	R gbm package was used and the parameters were set as: shrinkage=0.003, n.trees=3000, interaction.depth=10 and cv.folds=5
syn312111	Elestic Net	marginal_association_clinical	0.880135	0.619884	R glmnet packaage was used and alpha=c(10^(-5:-1), seq(0.2, 1, by = 0.1)), lambda=exp(seq(-5, 0, length = 25)),folds=5
syn311892	Elestic Net	topvarying	0.750475	0.617256	R glmnet packaage was used and alpha=c(10^(-5:-1), seq(0.2, 1, by = 0.1)), lambda=exp(seq(-5, 0, length = 25)),folds=5
syn311973	Lasso	marginal_association_clinical	0.878006	0.617032	R glmnet packaage was used and alpha=1, lambda=exp(seq(-5, 0, length = 25)),folds=5
syn376734	Random Forest	marginal_association_clinical	0.928942	0.614612	R randomSurvivalForest library was used with default parameters and 1000 trees
syn673524	Boosting	topvarying	0.919182	0.609601	R gbm package was used and the parameters were set as: shrinkage=0.003, n.trees=3000, interaction.depth=10 and cv.folds=5
syn376775	Random Forest	metabric_clustering_clinical	0.932547	0.609532	R randomSurvivalForest library was used with default parameters and 1000 trees
syn376798	Random Forest	topvarying_higgins_clinical	0.940896	0.609532	R randomSurvivalForest library was used with default parameters and 1000 trees
syn376939	Random Forest	MASP	0.91393	0.607641	R randomSurvivalForest library was used with default parameters and 1000 trees
syn416224	Lasso	MASP	0.715083	0.606631	R glmnet packaage was used and alpha=1, lambda=exp(seq(-5, 0, length = 25)),folds=5
syn376929	Random Forest	marginal_association	0.927467	0.603506	R randomSurvivalForest library was used with default parameters and 1000 trees
syn673508	Boosting	marginal_association	0.954185	0.603224	R gbm package was used and the parameters were set as: shrinkage=0.003, n.trees=3000, interaction.depth=10 and cv.folds=5
syn311502	Lasso	metabric_clustering	0.810948	0.602929	R glmnet packaage was used and alpha=1, lambda=exp(seq(-5, 0, length = 25)),folds=5
syn673379	Boosting	metabric_clustering	0.901635	0.601942	R gbm package was used and the parameters were set as: shrinkage=0.003, n.trees=3000, interaction.depth=10 and cv.folds=5
syn311888	Elestic Net	metabric_clustering	0.721988	0.599484	R glmnet packaage was used and alpha=c(10^(-5:-1), seq(0.2, 1, by = 0.1)), lambda=exp(seq(-5, 0, length = 25)),folds=5
syn376935	Random Forest	topvarying_higgins	0.937094	0.599163	R randomSurvivalForest library was used with default parameters and 1000 trees
syn673538	Boosting	cancer_census	0.944317	0.59885	R gbm package was used and the parameters were set as: shrinkage=0.003, n.trees=3000, interaction.depth=10 and cv.folds=5
syn311884	Elestic Net	cancer_census	0.791023	0.597253	R glmnet packaage was used and alpha=c(10^(-5:-1), seq(0.2, 1, by = 0.1)), lambda=exp(seq(-5, 0, length = 25)),folds=5
syn376859	Random Forest	topvarying_clinical	0.942569	0.597208	R randomSurvivalForest library was used with default parameters and 1000 trees
syn311890	Elestic Net	topvarying_higgins	0.737258	0.59583	R glmnet packaage was used and alpha=c(10^(-5:-1), seq(0.2, 1, by = 0.1)), lambda=exp(seq(-5, 0, length = 25)),folds=5
syn376669	Random Forest	cancer_census_clinical	0.933976	0.595061	R randomSurvivalForest library was used with default parameters and 1000 trees
syn312003	Lasso	topvarying	0.776803	0.590414	R glmnet packaage was used and alpha=1, lambda=exp(seq(-5, 0, length = 25)),folds=5
syn376932	Random Forest	metabric_clustering	0.931664	0.589677	R randomSurvivalForest library was used with default parameters and 1000 trees
syn311504	Lasso	topvarying_higgins	0.767677	0.582978	R glmnet packaage was used and alpha=1, lambda=exp(seq(-5, 0, length = 25)),folds=5
syn376937	Random Forest	topvarying	0.941672	0.582722	R randomSurvivalForest library was used with default parameters and 1000 trees
syn311488	Lasso	cancer_census	0.734566	0.581712	R glmnet packaage was used and alpha=1, lambda=exp(seq(-5, 0, length = 25)),folds=5
syn311886	Elestic Net	marginal_association	0.882325	0.580622	R glmnet packaage was used and alpha=c(10^(-5:-1), seq(0.2, 1, by = 0.1)), lambda=exp(seq(-5, 0, length = 25)),folds=5
syn376914	Random Forest	cancer_census	0.931543	0.577081	R randomSurvivalForest library was used with default parameters and 1000 trees
syn311997	Lasso	marginal_association	0.878645	0.574645	R glmnet packaage was used and alpha=1, lambda=exp(seq(-5, 0, length = 25)),folds=5
